# Supplementary material
Source: PubMed Central journal article supplement (PMC1815239)

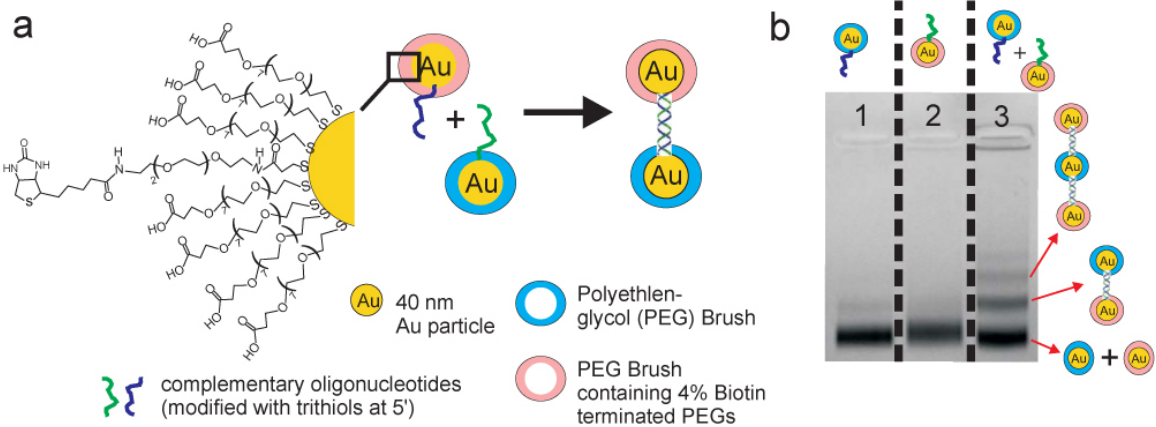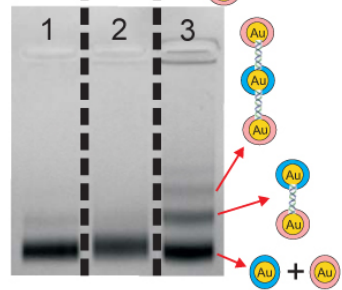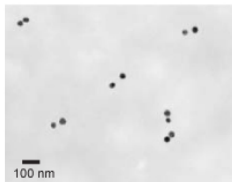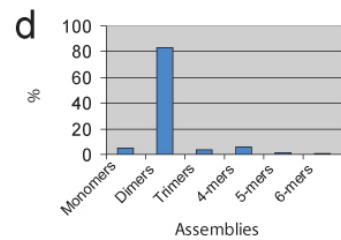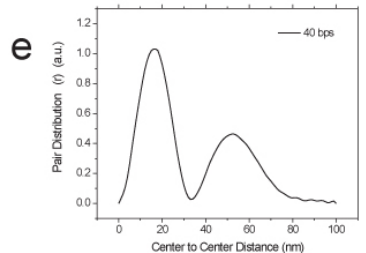

Supplement: pnas_0607826104_1.pdf [file pnas_0607826104_1.pdf]

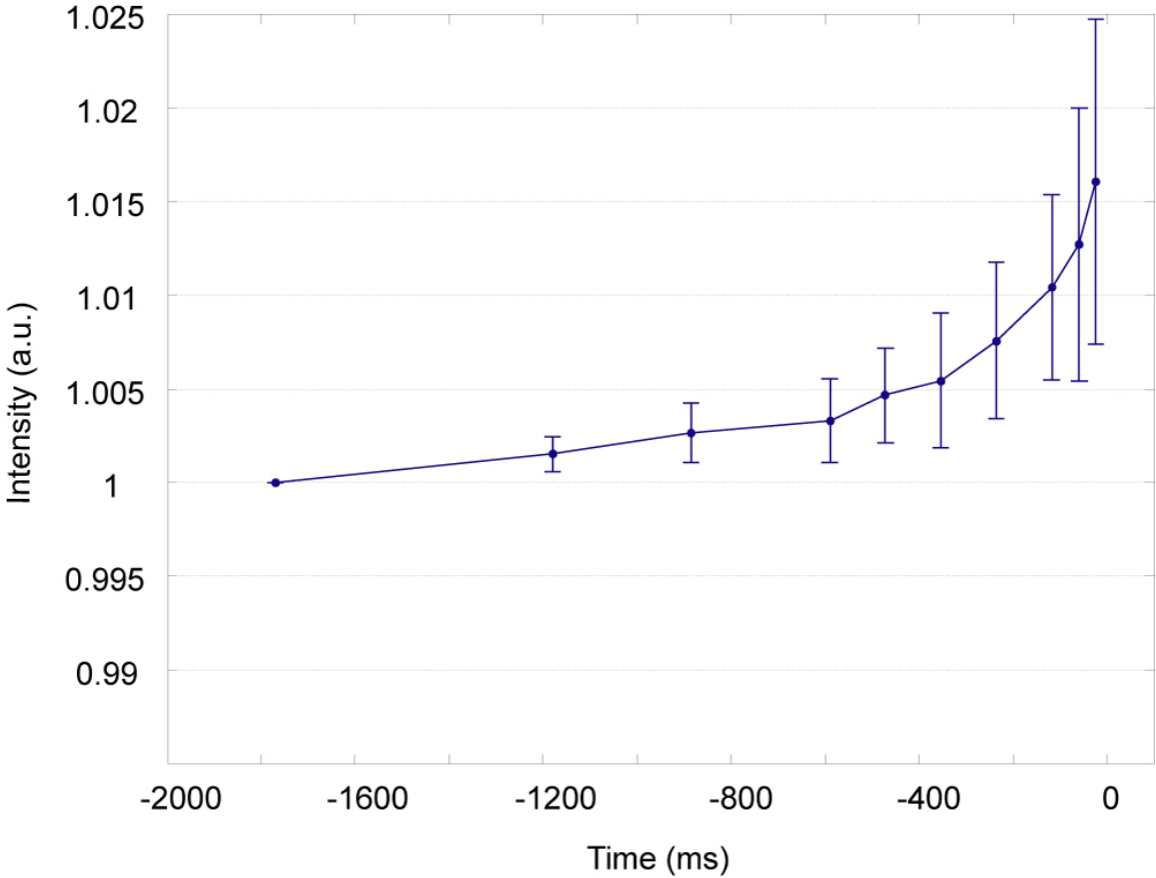

Supplement: pnas_0607826104_2.pdf [file pnas_0607826104_2.pdf]

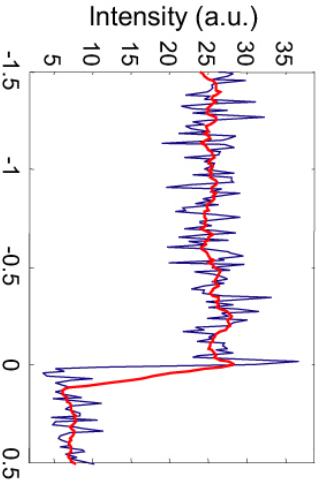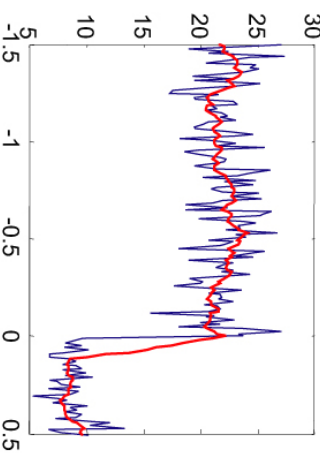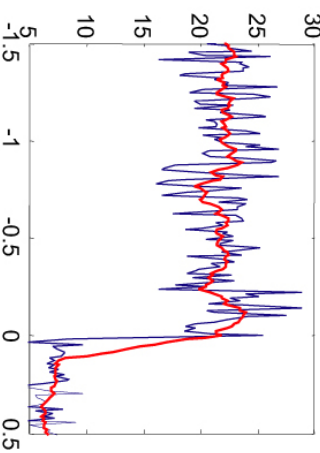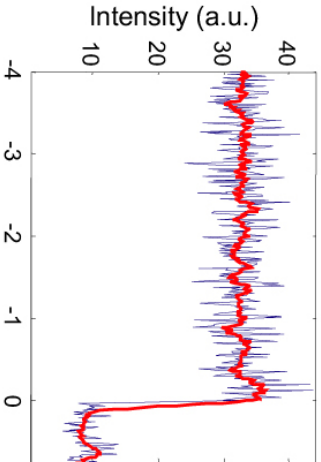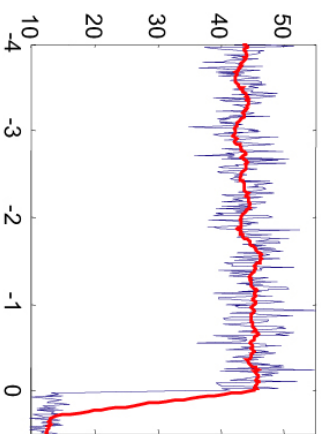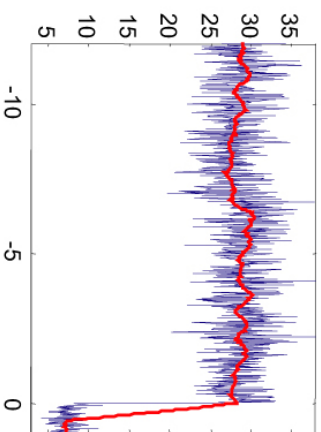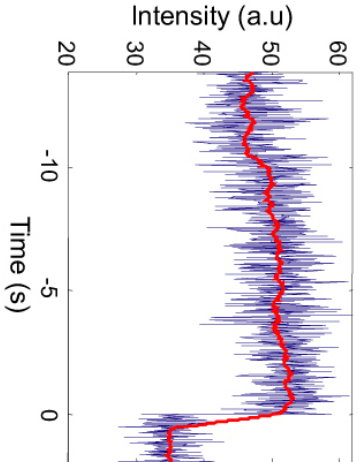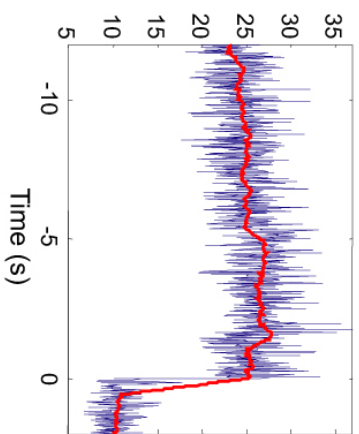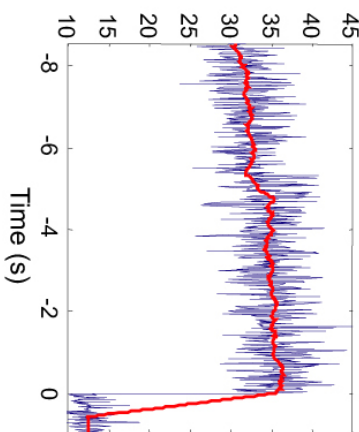

Supplement: pnas_0607826104_3.pdf [file pnas_0607826104_3.pdf]
